# Supplementary material for: Inhibition of the MAP3 kinase Tpl2 protects rodent and human β-cells from apoptosis and dysfunction induced by cytokines and enhances anti-inflammatory actions of exendin-4
Source: PubMed Central journal article supplement (PMC4816180; doi:10.1038/cddis.2015.399), 2016-01-21
Supplement: cddis2015399x1.pdf [file cddis2015399x1.pdf]

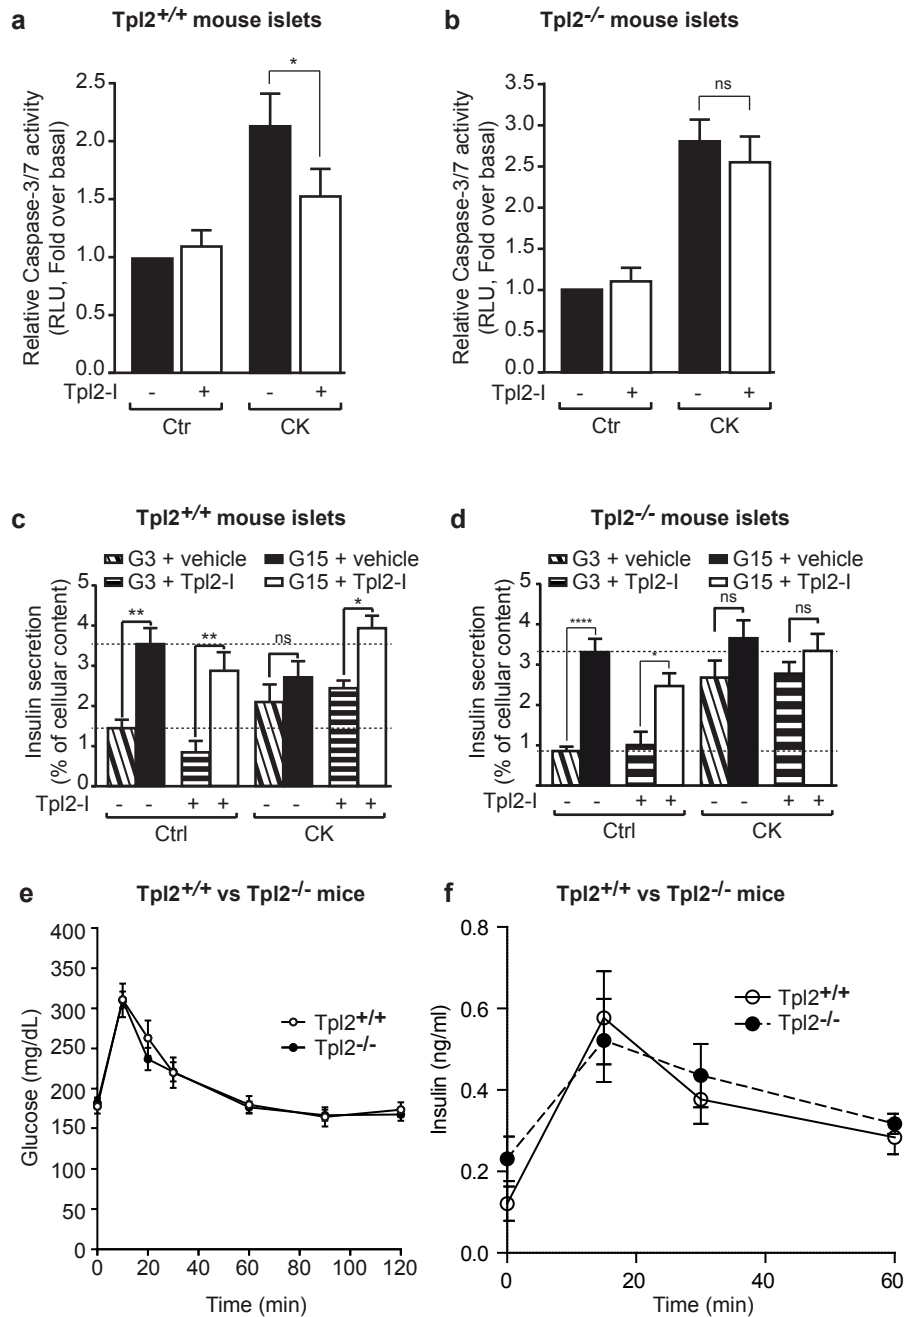

**Supplementary Figure 1. Tpl2 inhibitor specifically blocks Tpl2 activity effects and Tpl2<sup>-/-</sup> have no improvement of survival nor function.** **a-b:** Caspase-3/7 activity in mouse islets from **a:** WT (Tpl2<sup>+/+</sup>) or **b:** Tpl2-deficient (Tpl2<sup>-/-</sup>) untreated (Ctrl) or treated for 24 h with cytokine mix (CK) with or without Tpl2-I (3 μM). Data are mean ± SEM (N=8/group). \*P<0.05 vs CK (one-way ANOVA). **c-d:** Insulin secretion in response to glucose (3mmol/L (G3) vs 15mmol/L (G15)) on the same conditions that **a and b**. Data are mean ± SEM (N=8/group). \*P<0.05 G15 vs G3 (one-way ANOVA). **e and f:** intraperitoneal (*ip*) Glucose tolerance test performed in Tpl2<sup>+/+</sup> and Tpl2<sup>-/-</sup> mice (**e**), with associated plasma insulin level (**f**).
