# Supplementary material for: Inhibition of the MAP3 kinase Tpl2 protects rodent and human β-cells from apoptosis and dysfunction induced by cytokines and enhances anti-inflammatory actions of exendin-4
Source: PubMed Central journal article supplement (PMC4816180; doi:10.1038/cddis.2015.399), 2016-01-21
Supplement: cddis2015399x2.pdf [file cddis2015399x2.pdf]

**Online supplemental Table 1. List and references of antibodies**

| <b>Antibody</b>                  | <b>Reference</b> | <b>Company</b>            |
|----------------------------------|------------------|---------------------------|
| $\beta$ -actin                   | A-5441           | Sigma                     |
| Cleaved and total PARP           | 9542             | Cell Signaling            |
| Cleaved Caspase-3                | 9661             | Cell Signaling            |
| HRP-linked anti-mouse IgG        | SC-2005          | Santa Cruz                |
| HRP-linked anti-rabbit IgG       | 7074             | Cell Signaling            |
| HSP90                            | 05-594           | Upstate Biotechnology     |
| Phospho-p38 MAPK (Thr180/Tyr182) | 4511             | Cell Signaling            |
| Phospho-p90rsk (Thr573)          | 9346             | Cell Signaling            |
| Phospho-SAPK/JNK (Thr183/Tyr185) | 9251             | Cell Signaling            |
| Phospho-ERK1/2 (Thr202/Tyr204)   | 9106             | Cell Signaling            |
| Phospho-Tpl2 (Ser400)            | 4491             | Cell Signaling            |
| Total ERK1/2 (p42/p44 MAPK)      | 610030           | Transduction Laboratories |
| Total p38 MAPK                   | 9212             | Cell Signaling            |
| Total p90rsk                     | 9355             | Cell Signaling            |
| Total SAPK/JNK (p46/p54 SAPK)    | 9252             | Cell Signaling            |
| Total Tpl2 (C-term region)       | SC-720           | Santa Cruz                |
